# Associations Between Media Consumption Habits, Physical Activity, Socioeconomic Status, and Glycemic Control in Children, Adolescents, and Young Adults With Type 1 Diabetes

ANGELA GALLER, MD<sup>1</sup>  
MAREN LINDAU<sup>1</sup>  
ANDREA ERNERT, MSC<sup>1,2</sup>

RALF THALEMANN, PHD<sup>1</sup>  
KLEMENS RAILE, MD<sup>1</sup>

**OBJECTIVE**—To evaluate the relationship between media consumption habits, physical activity, socioeconomic status, and glycemic control in youths with type 1 diabetes.

**RESEARCH DESIGN AND METHODS**—In the cross-sectional study, self-report questionnaires were used to assess media consumption habits, physical activity, and socioeconomic status in 296 children, adolescents, and young adults with type 1 diabetes. Clinical data and HbA<sub>1c</sub> levels were collected. Risk factors were analyzed by multiple regression.

**RESULTS**—Youths with type 1 diabetes (aged  $13.7 \pm 4.1$  years, HbA<sub>1c</sub>  $8.7 \pm 1.6\%$ , diabetes duration  $6.1 \pm 3.3$  years) spent  $2.9 \pm 1.8$  h per day watching television and using computers. Weekly physical activity was  $5.1 \pm 4.5$  h. Multiple regression analysis identified diabetes duration, socioeconomic status, and daily media consumption time as significant risk factors for glycemic control.

**CONCLUSIONS**—Diabetes duration, socioeconomic status, and daily media consumption time, but not physical activity, were significant risk factors for glycemic control in youths with type 1 diabetes.

*Diabetes Care* 34:2356–2359, 2011

The pivotal Diabetes Control and Complications Trial (DCCT) and Epidemiology of Diabetes Interventions and Complications (EDIC) study demonstrate that poor glycemic control is associated with an increased risk of developing complications in type 1 diabetes (1). Various factors contributing to glycemic control have been identified (2). Immutability parameters such as age, sex, diabetes duration, and socioeconomic status have a major effect on metabolic control (2–6). Lower socioeconomic status is an important determinant for poor glycemic control (4,5). Modifiable factors influencing metabolic control are

diabetes-related knowledge, frequency of blood glucose monitoring, and daily insulin dose (3,4,6,7). Lastly, psychosocial parameters are important in achieving good glycemic control (3–5,8–10). The influence of physical activity on metabolic control is unclear (9,11,12).

Recent research addresses the influence of modern life habits on general health. Youths spend more and more time watching television and using computers. Many studies suggest that sedentary behaviors such as watching television lead to obesity in children (13,14). In one study in youths with type 1 diabetes, Margeirsdottir et al. (15) showed that

poor metabolic control was associated with extensive television watching. However, the authors did not examine other covariables, such as socioeconomic status, which is associated with both glycemic control and media consumption (4,5,16,17). Hence, the aim of this study was to examine the impact of media consumption habits, physical activity, and socioeconomic status on glycemic control in youths with type 1 diabetes.

## RESEARCH DESIGN AND METHODS

In 2008 and 2009, 296 youths with type 1 diabetes (aged <22 years) attending the diabetes pediatric outpatient clinic were included in the study. Anthropometric and clinical data were recorded. BMI SD score (BMI-SDS) was calculated using national reference data (18). HbA<sub>1c</sub> levels were determined by the immunoagglutination inhibition assay DCA 2000 (Bayer, Leverkusen, Germany). Self-report questionnaires from the German Health Interview and Examination Survey for Children and Adolescents (KiGGS), Robert Koch Institute, were used to determine time spent watching television and using computers (media consumption time) and to assess physical activity and socioeconomic status (19). Average daily hours of media consumption were used. In addition, questions about weekly hours of physical activity were asked. The Winkler index, with key variables graduation, school and professional education, academic training, profession, and income, was used to quantify socioeconomic status (19). The socioeconomic status index ranged from 3 to 21 points and was categorized as low (3–8 points), moderate (9–14 points), or high (15–21 points). The ethics committee of the medical faculty approved the study. Written informed consent was obtained.

## Statistical analysis

We analyzed the impact of sex, age, BMI-SDS, diabetes duration, insulin pump use,

From the <sup>1</sup>Department of Paediatric Endocrinology and Diabetology, Interdisziplinäres Sozialpädiatrisches Zentrum, University Hospital for Children and Adolescents, Campus Virchow Klinikum, Charité-Universitätsmedizin Berlin, Berlin, Germany; and the <sup>2</sup>Institute for Biometrics and Clinical Epidemiology, Campus Mitte, Charité-Universitätsmedizin Berlin, Berlin, Germany.

Corresponding author: Angela Galler, angela.galler@charite.de.

Received 3 May 2011 and accepted 18 August 2011.

DOI: 10.2337/dc11-0838

© 2011 by the American Diabetes Association. Readers may use this article as long as the work is properly cited, the use is educational and not for profit, and the work is not altered. See <http://creativecommons.org/licenses/by-nc-nd/3.0/> for details.

socioeconomic status, physical activity, media consumption time, and seasonality on HbA<sub>1c</sub>. We present a sample characteristic for HbA<sub>1c</sub> and all covariates using mean and SD or proportions, respectively. To analyze associations between HbA<sub>1c</sub> and covariates, we performed univariate analyses. To obtain adjusted results, multiple regression analysis with all covariates as independent variables was executed. The results should be interpreted in an explorative manner. Analyses were performed using SPSS version 18 (SPSS Inc., Chicago, IL).

**RESULTS**—Clinical characteristics of the 296 youths with type 1 diabetes were

as follows: age  $13.7 \pm 4.1$  years, diabetes duration  $6.1 \pm 3.3$  years, BMI-SDS  $0.51 \pm 0.90$ , and HbA<sub>1c</sub>  $8.7 \pm 1.6\%$ . Overall daily media consumption time was  $2.9 \pm 1.8$  h. Weekly physical activity was  $5.1 \pm 4.5$  h. Neither physical activity nor media consumption time was associated significantly with BMI-SDS ( $P = 0.15$  and  $P = 0.21$ ). Time of sporting activity was not significantly associated with media consumption time ( $P = 0.26$ ). Lower HbA<sub>1c</sub> levels were significantly associated with younger age, shorter diabetes duration, and higher socioeconomic status (Table 1). Youths who spent  $>3.9$  h per day consuming media had significantly

higher HbA<sub>1c</sub> levels compared with those who spent less time consuming media ( $9.3$  vs.  $8.4$  and  $8.5\%$ ,  $P = 0.001$ ) (Table 1). Regression analysis identified diabetes duration, socioeconomic status, and media consumption time as significant risk factors for HbA<sub>1c</sub> levels (Table 1). Per 1 h more daily media consumption time, we saw a mean enhancement of HbA<sub>1c</sub> by  $0.16\%$  (Table 1).

**CONCLUSIONS**—The current study is the first to demonstrate that extensive media consumption is a significant risk factor for poor metabolic control in youths with type 1 diabetes irrespective

Table 1—Univariate and multivariate analysis of HbA<sub>1c</sub>

|                               | Univariate analysis |                                    |                      | Multivariate analysis (linear regression model) |                  |
|-------------------------------|---------------------|------------------------------------|----------------------|-------------------------------------------------|------------------|
|                               | Percentage          | HbA <sub>1c</sub> (%) <sup>*</sup> | P value <sup>†</sup> | Regression coefficient $\beta$ (95% CI)         | P value          |
| Sex                           |                     |                                    |                      |                                                 |                  |
| Female                        | 48                  | $8.7 \pm 1.5$                      | 0.782                | −0.272 (−0.667 to 0.123) (male vs. female)      | 0.177            |
| Male                          | 52                  | $8.7 \pm 1.7$                      |                      |                                                 |                  |
| Age (years)                   |                     |                                    |                      |                                                 |                  |
| 1st quartile (2.9–10.9)       | 25                  | $8.0 \pm 0.9$                      | $<0.001\ddagger$     | 0.035 (−0.019 to 0.089)                         | 0.198            |
| 2nd quartile ( $>10.9$ –14.5) | 25                  | $8.6 \pm 1.3$                      |                      |                                                 |                  |
| 3rd quartile ( $>14.5$ –17.0) | 25                  | $9.1 \pm 1.8$                      |                      |                                                 |                  |
| 4th quartile ( $>17.0$ –22.0) | 25                  | $9.1 \pm 1.9$                      |                      |                                                 |                  |
| BMI-SDS                       |                     |                                    |                      |                                                 |                  |
| 1st quartile (−2.36 to 0.05)  | 25                  | $8.8 \pm 1.8$                      | 0.262                | −0.004 (−0.213 to 0.205)                        | 0.970            |
| 2nd quartile ( $>0.05$ –0.55) | 25                  | $8.4 \pm 1.5$                      |                      |                                                 |                  |
| 3rd quartile ( $>0.55$ –1.16) | 25                  | $8.8 \pm 1.7$                      |                      |                                                 |                  |
| 4th quartile ( $>1.16$ –2.85) | 25                  | $8.7 \pm 1.5$                      |                      |                                                 |                  |
| Diabetes duration (years)     |                     |                                    |                      |                                                 |                  |
| 1st quartile (1.0–3.4)        | 25                  | $8.0 \pm 1.3$                      | 0.001 $\ddagger$     | 0.066 (0.002–0.131)                             | 0.045 $\ddagger$ |
| 2nd quartile ( $>3.4$ –5.6)   | 25                  | $8.8 \pm 1.8$                      |                      |                                                 |                  |
| 3rd quartile ( $>5.6$ –8.4)   | 25                  | $8.9 \pm 1.5$                      |                      |                                                 |                  |
| 4th quartile ( $>8.4$ –16.7)  | 25                  | $9.1 \pm 1.7$                      |                      |                                                 |                  |
| Insulin pump                  |                     |                                    |                      |                                                 |                  |
| No                            | 79                  | $8.8 \pm 1.7$                      | 0.204                | −0.253 (−0.696 to 0.191) (yes vs. no)           | 0.262            |
| Yes                           | 21                  | $8.4 \pm 1.1$                      |                      |                                                 |                  |
| Socioeconomic status          |                     |                                    |                      |                                                 |                  |
| Low                           | 30                  | $8.9 \pm 1.7$                      | 0.004 $\ddagger$     | 0.801 (0.291–1.312) (low vs. high)              | 0.002 $\ddagger$ |
| Moderate                      | 37                  | $8.5 \pm 1.4$                      |                      |                                                 |                  |
| High                          | 33                  | $8.0 \pm 1.0$                      |                      |                                                 |                  |
| Media consumption (h/day)     |                     |                                    |                      |                                                 |                  |
| 1st quartile (0–1.6)          | 25                  | $8.5 \pm 1.5$                      | 0.001 $\ddagger$     | 0.158 (0.034–0.283)                             | 0.013 $\ddagger$ |
| 2nd quartile ( $>1.6$ –2.6)   | 24                  | $8.5 \pm 1.6$                      |                      |                                                 |                  |
| 3rd quartile ( $>2.6$ –3.9)   | 26                  | $8.4 \pm 1.3$                      |                      |                                                 |                  |
| 4th quartile ( $>3.9$ –9.0)   | 25                  | $9.3 \pm 1.8$                      |                      |                                                 |                  |
| Physical activity (h/week)    |                     |                                    |                      |                                                 |                  |
| 1st quartile (0–2)            | 33                  | $8.8 \pm 1.6$                      | 0.465                | 0.014 (−0.030 to 0.057)                         | 0.619            |
| 2nd quartile ( $>2$ –4)       | 19                  | $8.6 \pm 1.8$                      |                      |                                                 |                  |
| 3rd quartile ( $>4$ –7)       | 26                  | $8.6 \pm 1.5$                      |                      |                                                 |                  |
| 4th quartile ( $>7$ –30)      | 22                  | $8.9 \pm 1.7$                      |                      |                                                 |                  |
| Seasonality                   |                     |                                    |                      |                                                 |                  |
| Warm season                   | 12                  | $8.6 \pm 1.6$                      | 0.731                | 0.241 (−0.830 to 0.348)                         | 0.420            |
| Cold season                   | 88                  | $8.7 \pm 1.6$                      |                      |                                                 |                  |

<sup>\*</sup>Calculation of mean HbA<sub>1c</sub>  $\pm$  SD for different subgroups related to covariates. Normal range HbA<sub>1c</sub>: 4.3–5.6%. <sup>†</sup>Kruskal-Wallis test. <sup>‡</sup> $P < 0.05$ .

of socioeconomic status and physical activity. Several mechanisms possibly explain why media consumption time was associated with glycemic control. First, watching television promotes snacks between meals (20). Adolescents who reported watching more television had greater unhealthy food intake (20,21). Administering the correct insulin dose for ongoing eating during television time is probably more difficult compared with a shared family meal where parents support the child in calculating and injecting the insulin. It is regrettable that our study did not include questions about eating behavior or frequency of snacks during television watching. Second, family structure (e.g., single-parent household), family dynamics, and communication are important determinants of HbA<sub>1c</sub> in youths with type 1 diabetes (8,10,22). Furthermore, depression of the child and depressive disorders in families are reasons why children watch more or extensively television (23). Regrettably, and as one limitation of our study, we had no detailed data about family structures or coping abilities in families. Lastly, sedentary behavior is associated with less physical activity and overweight status (13,14). Obesity possibly increases insulin resistance with a negative influence on metabolic control (24). However, in our study we did not find any associations between media consumption time and physical activity or BMI. In addition, physical activity in our study was not correlated with glycemic control. Other studies examining physical activity and its influence on metabolic control show controversial results (9,11,25).

In summary, identifying determinants for poor glycemic control is important. However, in many studies, factors such as age, sex, socioeconomic status, frequency of glucose monitoring, and diabetes knowledge together explain only <20% of the variance in HbA<sub>1c</sub> (4). This is similar to our study, in which 18% of the variance of HbA<sub>1c</sub> was explained by the examined factors. Therefore, extensive media consumption and many of the risk factors known to date can explain only part of the variance in HbA<sub>1c</sub> and part of the risk for poor glycemic control. Further studies (e.g., intervention studies) are needed to improve on our understanding of metabolic control.

**Acknowledgments**—No potential conflicts of interest relevant to this article were reported.

A.G. researched data, contributed to discussion, and wrote, reviewed, and edited the manuscript. M.L. researched data, contributed to discussion, and reviewed the manuscript. A.E. researched data, contributed to discussion, and wrote, reviewed, and edited the manuscript. R.T. researched data, contributed to discussion, and reviewed and edited the manuscript. K.R. contributed to discussion and reviewed the manuscript.

The authors thank all children, adolescents, and young adults with type 1 diabetes and their parents who gave their consent and participated in the study. The authors also kindly acknowledge the Robert Koch Institute (Heike Hölling, Bärbel-Maria Kurth) for the use of part of the KiGGS questionnaire.

## References

- Writing Team for the Diabetes Control and Complications Trial/Epidemiology of Diabetes Interventions and Complications Research Group. Effect of intensive therapy on the microvascular complications of type 1 diabetes mellitus. *JAMA* 2002; 287:2563–2569
- Craig ME, Hattersley A, Donaghue KC. Definition, epidemiology and classification of diabetes in children and adolescents. *Pediatr Diabetes* 2009;10(Suppl. 12): 3–12
- Rosilio M, Cotton JB, Wieliczko MC, et al.; French Pediatric Diabetes Group. Factors associated with glycemic control. A cross-sectional nationwide study in 2,579 French children with type 1 diabetes. *Diabetes Care* 1998;21:1146–1153
- Devries JH, Snoek FJ, Heine RJ. Persistent poor glycaemic control in adult type 1 diabetes. A closer look at the problem. *Diabet Med* 2004;21:1263–1268
- Hassan K, Loar R, Anderson BJ, Heptulla RA. The role of socioeconomic status, depression, quality of life, and glycemic control in type 1 diabetes mellitus. *J Pediatr* 2006; 149:526–531
- Hanberger L, Samuelsson U, Lindblad B, Ludvigsson J; Swedish Childhood Diabetes Registry SWEDIABKIDS. A1C in children and adolescents with diabetes in relation to certain clinical parameters: the Swedish Childhood Diabetes Registry SWEDIABKIDS. *Diabetes Care* 2008;31: 927–929
- Nordly S, Mortensen HB, Andreasen AH, Hermann N, Jørgensen T. Factors associated with glycaemic outcome of childhood diabetes care in Denmark. *Diabet Med* 2005;22:1566–1573
- Cameron FJ, Skinner TC, de Beaufort CE, et al.; Hvidoere Study Group on Childhood Diabetes. Are family factors universally related to metabolic outcomes in adolescents with type 1 diabetes? *Diabet Med* 2008;25:463–468
- Aman J, Skinner TC, de Beaufort CE, Swift PG, Aanstoot HJ, Cameron F; Hvidoere Study Group on Childhood Diabetes. Associations between physical activity, sedentary behavior, and glycemic control in a large cohort of adolescents with type 1 diabetes: the Hvidoere Study Group on Childhood Diabetes. *Pediatr Diabetes* 2009; 10:234–239
- Hoey H; Hvidoere Study Group on Childhood Diabetes. Psychosocial factors are associated with metabolic control in adolescents: research from the Hvidoere Study Group on Childhood Diabetes. *Pediatr Diabetes* 2009;10(Suppl. 13):9–14
- Valerio G, Spagnuolo MI, Lombardi F, Spadaro R, Siano M, Franzese A. Physical activity and sports participation in children and adolescents with type 1 diabetes mellitus. *Nutr Metab Cardiovasc Dis* 2007; 17:376–382
- Benevento D, Bizzarri C, Pitocco D, et al.; IMDIAB Group. Computer use, free time activities and metabolic control in patients with type 1 diabetes. *Diabetes Res Clin Pract* 2010;88:32–34
- Marshall SJ, Biddle SJ, Gorely T, Cameron N, Murdey I. Relationships between media use, body fatness and physical activity in children and youth: a meta-analysis. *Int J Obes Relat Metab Disord* 2004;28: 1238–1246
- Fulton JE, Wang X, Yore MM, Carlson SA, Galuska DA, Caspersen CJ. Television viewing, computer use, and BMI among U.S. children and adolescents. *J Phys Act Health* 2009;6(Suppl. 1):S28–S35
- Margeisdottir HD, Larsen JR, Brunborg C, Sandvik L, Dahl-Jørgensen K; Norwegian Study Group for Childhood Diabetes. Strong association between time watching television and blood glucose control in children and adolescents with type 1 diabetes. *Diabetes Care* 2007;30:1567–1570
- Christakis DA, Ebel BE, Rivara FP, Zimmerman FJ. Television, video, and computer game usage in children under 11 years of age. *J Pediatr* 2004;145:652–656
- Patriarca A, Di Giuseppe G, Albano L, Marinelli P, Angelillo IF. Use of television, videogames, and computer among children and adolescents in Italy. *BMC Public Health* 2009;9:139
- Kromeyer-Hauschild K, Wabitsch M, Kunze D, et al. Percentiles of body mass index in children and adolescents evaluated from different regional German studies. *Monatsschr Kinderheilkd* 2001;149:807–818 [in German]
- Lampert T, Sygusch R, Schlack R. Use of electronic media in adolescence. Results of the German Health Interview and Examination Survey for Children and Adolescents (KiGGS). *Bundesgesundheitsblatt Gesundheitsforschung Gesundheitsschutz* 2007;50:643–652 [in German]
- Matheson DM, Killen JD, Wang Y, Varady A, Robinson TN. Children's food consumption

- during television viewing. *Am J Clin Nutr* 2004;79:1088–1094
21. French SA, Story M, Neumark-Sztainer D, Fulkerson JA, Hannan P. Fast food restaurant use among adolescents: associations with nutrient intake, food choices and behavioral and psychosocial variables. *Int J Obes Relat Metab Disord* 2001;25:1823–1833
22. Hoyos Cillero I, Jago R. Sociodemographic and home environment predictors of screen viewing among Spanish school children. *J Public Health (Oxf)* 2011;33:392–402
23. Hoyos Cillero I, Jago R. Systematic review of correlates of screen-viewing among young children. *Prev Med* 2010;51:3–10
24. Kilpatrick ES, Rigby AS, Atkin SL. Insulin resistance, the metabolic syndrome, and complication risk in type 1 diabetes: “double diabetes” in the Diabetes Control and Complications Trial. *Diabetes Care* 2007;30:707–712
25. Rachmiel M, Buccino J, Daneman D. Exercise and type 1 diabetes mellitus in youth; review and recommendations. *Pediatr Endocrinol Rev* 2007;5:656–665
